# Supplementary material
Source: publisher site journal article supplement (https://www.spandidos-publications.com/5337/downloadSupplementary)
Supplement: Supplementary file 1 [file downloadSupplementary]

Table SI. Side effects.

| Event              | Lifestyle intervention<br>(n=22) | Liraglutide<br>(n=17) | P-value <sup>a</sup> |
|--------------------|----------------------------------|-----------------------|----------------------|
| Headache           |                                  |                       | 0.099                |
| Yes                | 0                                | 2                     |                      |
| No                 | 22                               | 15                    |                      |
| Dizziness          |                                  |                       | 0.099                |
| Yes                | 0                                | 2                     |                      |
| No                 | 22                               | 15                    |                      |
| Tiredness          |                                  |                       | NA <sup>b</sup>      |
| Yes                | 0                                | 0                     |                      |
| No                 | 22                               | 17                    |                      |
| Nausea             |                                  |                       | 0.079                |
| Yes                | 1                                | 4                     |                      |
| No                 | 21                               | 13                    |                      |
| Vomiting           |                                  |                       | NA <sup>b</sup>      |
| Yes                | 0                                | 0                     |                      |
| No                 | 22                               | 17                    |                      |
| Dry mouth          |                                  |                       | NA <sup>b</sup>      |
| Yes                | 0                                | 0                     |                      |
| No                 | 22                               | 17                    |                      |
| Constipation       |                                  |                       | NA <sup>b</sup>      |
| Yes                | 0                                | 0                     |                      |
| No                 | 22                               | 17                    |                      |
| Nasopharyngitis    |                                  |                       | 0.099                |
| Yes                | 0                                | 2                     |                      |
| No                 | 22                               | 15                    |                      |
| Anaphylaxis        |                                  |                       | 0.099                |
| Yes                | 0                                | 2                     |                      |
| No                 | 22                               | 15                    |                      |
| Diarrhea           |                                  |                       | 0.401                |
| Yes                | 1                                | 2                     |                      |
| No                 | 21                               | 15                    |                      |
| Abdominal pain     |                                  |                       | NA <sup>b</sup>      |
| Yes                | 0                                | 0                     |                      |
| No                 | 22                               | 17                    |                      |
| Decreased appetite |                                  |                       | 0.249                |
| Yes                | 0                                | 1                     |                      |
| No                 | 22                               | 16                    |                      |
| Upset stomach      |                                  |                       | NA <sup>b</sup>      |
| Yes                | 0                                | 0                     |                      |
| No                 | 22                               | 16                    |                      |

<sup>a</sup>P-value was calculated using  $\chi^2$  exact test. <sup>b</sup>P-value was not applicable since the occurrence frequency was 0 for the lifestyle intervention and liraglutide groups. NA, not applicable.

Table SII. Location of atherosclerosis.

| Location          | Lifestyle intervention<br>(n=22) | Liraglutide<br>(n=17) | P-value <sup>a</sup> |
|-------------------|----------------------------------|-----------------------|----------------------|
| Aorta             |                                  |                       | NA <sup>b</sup>      |
| Yes               | 0                                | 0                     |                      |
| No                | 22                               | 17                    |                      |
| Coronary artery   |                                  |                       | 0.148                |
| Yes               | 5                                | 1                     |                      |
| No                | 17                               | 16                    |                      |
| Cerebral artery   |                                  |                       | NA <sup>b</sup>      |
| Yes               | 0                                | 0                     |                      |
| No                | 22                               | 17                    |                      |
| Renal artery      |                                  |                       | NA <sup>b</sup>      |
| Yes               | 0                                | 0                     |                      |
| No                | 22                               | 17                    |                      |
| Mesenteric artery |                                  |                       | NA <sup>b</sup>      |
| Yes               | 0                                | 0                     |                      |
| No                | 22                               | 17                    |                      |
| Peripheral artery |                                  |                       | 0.582                |
| Yes               | 4                                | 2                     |                      |
| No                | 18                               | 15                    |                      |

<sup>a</sup>P-value was calculated by  $\chi^2$  test. <sup>b</sup>P-value was not applicable since the occurrence frequency was 0 for the lifestyle intervention and liraglutide groups. NA, not applicable.
